# Supplementary material for: Machine-learning approach identifies a pattern of gene expression in peripheral blood that can accurately detect ischaemic stroke
Source: PubMed Central journal article supplement (PMC5685316; doi:10.1038/npjgenmed.2016.38), 2016-11-30
Supplement: npjgenmed201638-s2.pdf [file npjgenmed201638-s2.pdf]

# SUPPLEMENTAL TABLE 1.

**A**

|               | <i>MAL</i>        | <i>GRAP</i>       | <i>ID3</i>        | <i>PLXDC2</i>    | <i>KIF1B</i>     | <i>CD163</i>     | <i>CTSZ</i>      | <i>PDK4</i>      | <i>STK3</i>      | r<br>(p) |
|---------------|-------------------|-------------------|-------------------|------------------|------------------|------------------|------------------|------------------|------------------|----------|
| <i>GRAP</i>   | 0.93<br>(<0.001)  |                   |                   |                  |                  |                  |                  |                  |                  |          |
| <i>ID3</i>    | 0.85<br>(<0.001)  | 0.88<br>(<0.001)  |                   |                  |                  |                  |                  |                  |                  |          |
| <i>PLXDC2</i> | -0.72<br>(<0.001) | -0.80<br>(<0.001) | -0.82<br>(<0.001) |                  |                  |                  |                  |                  |                  |          |
| <i>KIF1B</i>  | -0.65<br>(<0.001) | -0.71<br>(<0.001) | -0.69<br>(<0.001) | 0.81<br>(<0.001) |                  |                  |                  |                  |                  |          |
| <i>CD163</i>  | -0.76<br>(<0.001) | -0.76<br>(<0.001) | -0.79<br>(<0.001) | 0.83<br>(<0.001) | 0.70<br>(<0.001) |                  |                  |                  |                  |          |
| <i>CTSZ</i>   | -0.43<br>(<0.001) | -0.46<br>(<0.001) | -0.46<br>(<0.001) | 0.57<br>(<0.001) | 0.54<br>(<0.001) | 0.58<br>(<0.001) |                  |                  |                  |          |
| <i>PDK4</i>   | -0.59<br>(<0.001) | -0.63<br>(<0.001) | -0.52<br>(<0.001) | 0.51<br>(<0.001) | 0.54<br>(<0.001) | 0.59<br>(<0.001) | 0.38<br>(0.001)  |                  |                  |          |
| <i>STK3</i>   | -0.67<br>(<0.001) | -0.72<br>(<0.001) | -0.64<br>(<0.001) | 0.74<br>(<0.001) | 0.78<br>(<0.001) | 0.79<br>(<0.001) | 0.59<br>(<0.001) | 0.75<br>(<0.001) |                  |          |
| <i>ANTXR2</i> | -0.51<br>(<0.001) | -0.56<br>(<0.001) | -0.60<br>(<0.001) | 0.77<br>(<0.001) | 0.78<br>(<0.001) | 0.63<br>(<0.001) | 0.58<br>(<0.001) | 0.41<br>(<0.001) | 0.58<br>(<0.001) |          |

KMO: 0.88    BARTLETTS SPHERICITY: p<0.001

PC1:  
70% VARIANCE  
 $\lambda=6.99$

**B**

|               | LOADINGS | COEFFICIENT |
|---------------|----------|-------------|
| <i>MAL</i>    | -0.86    | -0.12       |
| <i>GRAP</i>   | -0.91    | -0.13       |
| <i>ID3</i>    | -0.88    | -0.13       |
| <i>PLXDC2</i> | 0.92     | 0.13        |
| <i>KIF1B</i>  | 0.87     | 0.12        |
| <i>CD163</i>  | 0.90     | 0.13        |
| <i>CTSZ</i>   | 0.66     | 0.09        |
| <i>PDK4</i>   | 0.70     | 0.10        |
| <i>STK3</i>   | 0.87     | 0.12        |
| <i>ANTXR2</i> | 0.76     | 0.11        |

COMPOSITE RNA EXPRESSION

**Use of principal components analysis for generation of a composite RNA expression variable summarizing the coordinate expression levels of the top ten genes.** (A) Correlation matrix depicting the correlations between the expression levels of the top 10 genes identified by GA/kNN in the discovery cohort. (B) Principal component (PC) loadings and coefficients used for generation of the composite RNA expression variable.
