# Supplementary material for: Machine-learning approach identifies a pattern of gene expression in peripheral blood that can accurately detect ischaemic stroke
Source: PubMed Central journal article supplement (PMC5685316; doi:10.1038/npjgenmed.2016.38), 2016-11-30
Supplement: npjgenmed201638-s4.pdf [file npjgenmed201638-s4.pdf]

**SUPPLEMENTAL TABLE 3.** Primers and thermocycling conditions used for qRT-PCR.

| <b>GENE</b>   | <b>TRANSCRIPTS<sup>1</sup></b> | <b>PRIMERS (5' to 3')<sup>2</sup></b> | <b>PRODUCT (bp)</b> |
|---------------|--------------------------------|---------------------------------------|---------------------|
| <b>ANTXR2</b> | NM_058172.5                    | <b>FOR:</b> GATCTCTACTTCGTCCTGGACA    | <b>90</b>           |
|               | NM_001145794.1                 | <b>REV:</b> AAATCTCTCCGCAAGTTGCTG     |                     |
| <b>STK3</b>   | NM_006281.3                    | <b>FOR:</b> CGATGTTGGAATCCGACTTGG     | <b>105</b>          |
|               | XM_011517258.1                 | <b>REV:</b> GTCTTTGTAAGTGTGGTGAGGTT   |                     |
|               | XM_011517255.1                 |                                       |                     |
|               | XM_011517254.1                 |                                       |                     |
|               | XM_011517253.1                 |                                       |                     |
|               | XM_011517252.1                 |                                       |                     |
|               | XM_011517251.1                 |                                       |                     |
|               | XM_011517250.1                 |                                       |                     |
|               | XM_011517249.1                 |                                       |                     |
|               | XM_011517247.1                 |                                       |                     |
|               | NM_001256312.1                 |                                       |                     |
|               | NM_001256313.1                 |                                       |                     |
| <b>PDK4</b>   | NM_002612.3                    | <b>FOR:</b> GACCCAGTCACCAATCAAAATCT   | <b>82</b>           |
|               |                                | <b>REV:</b> GGTTTCATCAGCATCCGAGTAGA   |                     |
| <b>CD163</b>  | NM_004244.5                    | <b>FOR:</b> GCGGGAGAGTGGAAGTGAAAG     | <b>89</b>           |
|               | XM_005253529.3                 | <b>REV:</b> GTTACAAATCACAGAGACCGCT    |                     |
|               | XM_005253528.3                 |                                       |                     |
|               | NM_203416.3                    |                                       |                     |
| <b>MAL</b>    | NM_002371.3                    | <b>FOR:</b> GCCCTCTTTTACCTCAGCG       | <b>95</b>           |
|               | NM_022439.2                    | <b>REV:</b> GCAATGTTTTTCATGGTAGTGCCT  |                     |
| <b>GRAP</b>   | NM_006613.3                    | <b>FOR:</b> AGCCCTTGCTCAAGTCACC       | <b>180</b>          |
|               |                                | <b>REV:</b> CGTAACTCCGTGGGAAGAAGC     |                     |
| <b>ID3</b>    | NM_002167.4                    | <b>FOR:</b> GAGAGGCACTCAGCTTAGCC      | <b>170</b>          |
|               |                                | <b>REV:</b> TCCTTTTGTGCTTGGAGATGAC    |                     |
| <b>CTSZ</b>   | NM_001336.3                    | <b>FOR:</b> CAGCGGATCTGCCCAAGAG       | <b>198</b>          |
|               |                                | <b>REV:</b> CGATGACGTTCTGCACGGA       |                     |
| <b>PLXDC2</b> | NM_032812.8                    | <b>FOR:</b> ACTCAGATCGAGGAGGATACAGA   | <b>75</b>           |
|               | XM_011519750.1                 | <b>REV:</b> CCGGCTGGCAGAATCAGATG      |                     |
| <b>KIF1B</b>  | NM_015074.3                    | <b>FOR:</b> AAACAAGGGTAATTTGCGTGTGC   | <b>78</b>           |
|               | NM_183416.3                    | <b>REV:</b> GTAAGTCCCAACTTGGACAGAT    |                     |
| <b>PPIB</b>   | NM_000942.4                    | <b>FOR:</b> AAGTCACCGTCAAGGTGTATTTT   | <b>153</b>          |
|               |                                | <b>REV:</b> TGCTGTTTTTGTAGCCAAATCCT   |                     |
| <b>B2M</b>    | NM_004048.2                    | <b>FOR:</b> GAGGCTATCCAGCGTACTCCA     | <b>248</b>          |
|               | XM_006725182.2                 | <b>REV:</b> CGGCAGGCATACTCATCTTTT     |                     |
|               | XM_005254549.2                 |                                       |                     |
| <b>ACTB</b>   | NM_001101.3                    | <b>FOR:</b> CATGTACGTTGCTATCCAGGC     | <b>250</b>          |
|               | XM_006715764.1                 | <b>REV:</b> CTCCTTAATGTCACGCACGAT     |                     |

<sup>1</sup>Listed by NCBI accession number<sup>2</sup>All targets were amplified for 40 cycles of 95°C (15s) / 60°C (60s)
